# Supplementary material
Source: Springer Nature journal article supplement (https://www.springermedizin.de/resource/supplementary/12889_2009_2320_MOESM3_ESM.pdf/9485374)

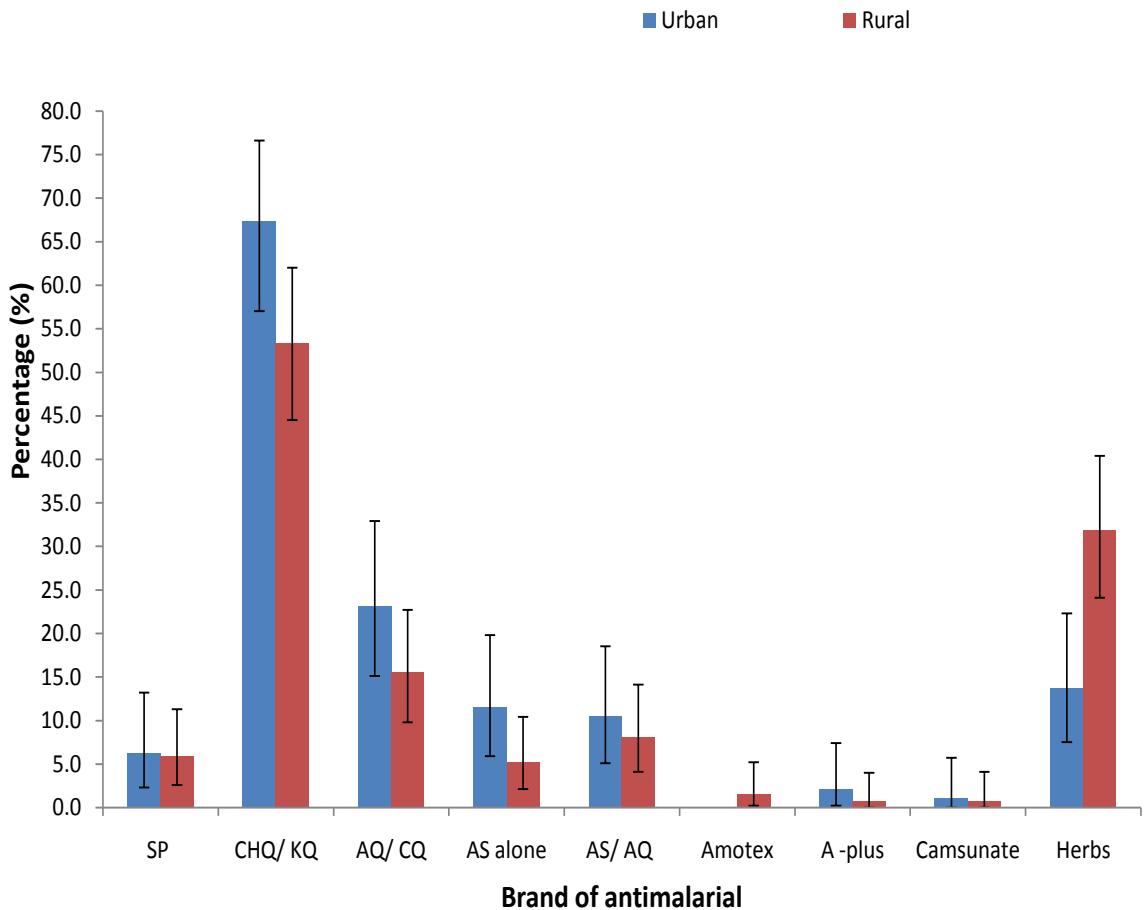

Supplement: MOESM3 [file 9485374]
